# Supplementary material for: Individual Microparticle Manipulation Using Combined Electroosmosis and Dielectrophoresis through a Si3N4 Film with a Single Micropore
Source: MDPI journal article supplement (doi:10.3390/mi12121578), 2021-12-18
Supplement: s1 [file s1]

**Table S1** The parameters used in the FEM model

| Parameters                                               | Value                  |
|----------------------------------------------------------|------------------------|
| The thickness of the Si <sub>3</sub> N <sub>4</sub> film | 1 um                   |
| The radius of the hole                                   | 2 um                   |
| The thickness of the chip                                | 528 um                 |
| The radius of the chamber                                | 1500 um                |
| The height of the chamber                                | 2000 um                |
| The width of the top window                              | 1310 um                |
| The conductivity of the deionized water                  | 2.3e-4 S/m             |
| The permittivity of the deionized water                  | 78                     |
| The conductivity of the particle                         | 1e-6 S/m               |
| The permittivity of the particle                         | 2.5                    |
| The diameter of the particle                             | 10 um                  |
| The density of the particle                              | 1050 kg/m <sup>3</sup> |
